# Supplementary material
Source: HighWire-hosted journal article supplement (https://erj.ersjournals.com/content/55/5/1901945)
Supplement: inline-supplementary-material-1 [file inline-supplementary-material-1.pdf]

## SUPPLEMENTARY MATERIAL

### **OBSTRUCTIVE SLEEP APNOEA TREATMENT AND BLOOD PRESSURE: WHICH PHENOTYPES PREDICT A RESPONSE? A SYSTEMATIC REVIEW AND META-ANALYSIS**

Pengo MF<sup>1</sup>, Soranna D<sup>1\*</sup>, Giontella A<sup>2\*</sup>, Perger E<sup>1</sup>, Mattaliano P<sup>1</sup>, Schwarz EI<sup>3</sup>, Lombardi C<sup>1</sup>, Bilo G<sup>1</sup>, Zambon A<sup>4</sup>, Steier J<sup>5</sup>, Parati G<sup>1,6</sup>, Minuz P<sup>2</sup>, Fava C<sup>2</sup>

1 Department of Cardiovascular, Neural and Metabolic Sciences, IRCCS Istituto Auxologico Italiano, Milan, Italy

2 Department of Medicine, University of Verona, Section of General Medicine and Hypertension, Verona, Italy

3 Department of Pulmonology and Sleep Disorders Center, University Hospital of Zurich, Zurich, Switzerland

4 Department of Statistics and Quantitative Methods, Università di Milano-Bicocca, Milan, Italy

5 CHAPS, Faculty of Life sciences and Medicine, King's College London, UK

6. Department of Medicine and Surgery, University of Milano-Bicocca, Milan, Italy

\* joint co-authorship

Corresponding author:

Cristiano Fava MD, PhD  
Associate professor of Internal Medicine  
University of Verona - Department of Medicine  
Azienda Ospedaliera Universitaria Integrata di Verona  
General Medicine & Hypertension Unit  
Hospital "Policlinico G.B. Rossi"  
P.zza L.A. Scuro 10 37134 Verona, Italy  
Phone: +39 045 8124732  
Fax: +39 045 8027465

#### **Literature search**

The keywords and/or corresponding MeSH terms to carry out the search were: ("obstructive sleep apn\*" OR "sleep apn\* syndrome" OR "polysomnography" OR "OSA" OR "OSAS" OR "SAHS" OR "sleep apn\*/hypopnea/hypoventilation") AND ("continuous positive air\*" OR "continuous positive air\* pressure" OR cPAP OR "positive pressure respiration" OR "oral appliance" OR "mandibular

advancement" OR "dental appliance" OR "mandibular device" OR "dental device" OR "oral device") AND ("randomised controlled trial"). We included original, peer-reviewed RCTs if published as full text or even abstract (if sufficient data were present) and did not include any language or gender restriction.

Besides, a search of the online databases of general medical, respiratory, and sleep journals as indexed by ISI Web of Science was performed looking for advance online publications. We hand-searched the contents pages of the last 10 issues of these journals, the online first articles and the bibliographies of relevant articles to retrieve further potential publications. We fixed January the 9<sup>th</sup>, 2019 as the cut-off date for the inclusion of new studies, thereby avoiding subjectivities in the choice of the time point when new information is reviewed and allowing calendar year-based assessments.

### **Data collection process and extracted items**

The Cochrane Consumers and Communication Review extraction template was adopted for standardisation of data extraction. Data were extracted independently by two investigators (AG and MP). Inconsistencies were resolved by discussion with CF and DS, and a final consensus was reached. For each included study, we extracted study identifiers (the first author's name, year of publication), design (type of study, crossover or parallel design), characteristics of the study participants (age, gender, BMI [body mass index]), including diagnosis and procedural characteristics at study entry), weeks of treatment, the presence of comorbidities (in particular chronic heart failure), mean compliance with CPAP (hours per night), percentage of hypertensive participants, percentage of participants treated with antihypertensive medications, the grade of sleepiness (measured by the Epworth Sleepiness Scale [ESS]), the numbers of apnoea/hypopnoea per hour of sleep (AHI), characteristics of the study intervention, the type of control arm, methods to measure BP (office or ambulatory blood pressure monitoring [ABPM] or beat-to-beat blood pressure monitoring) SBP and DBP mean values at baseline, mean SBP and DBP at end treatment. When only mean arterial pressure (MAP) was reported, not to exclude important information, we estimated systolic and diastolic BP according to the formula  $MAP = 1/3(SBP - DBP) + DBP$  and considering SBP as 1,65-times diastolic BP and SD of MAP as 1,2-times that of diastolic BP and 0,6-times that of systolic BP. The coefficients of these estimates were based on the data calculated from all the included studies that reported sufficient information.

**Table E1.** Chronological summary of literature on the effect of OSA treatment on blood pressure, and the main trial characteristics (references [16–76] in main article References list).

| Author and publication year | Study type | Strata | Comparator   | Follow-up (weeks) | Sample size Total (CPAP/Control) | Age Mean | Male gender (%) | BMI Mean | Compliance Mean | AHI Mean | ESS score Mean | Quality score (Jadad score) |
|-----------------------------|------------|--------|--------------|-------------------|----------------------------------|----------|-----------------|----------|-----------------|----------|----------------|-----------------------------|
| Engleman HM et al 1996      | Crossover  |        | Placebo      | 3                 | 13 (13/13)                       | 51.00    | 84.60           | 36.00    | 4.30            | 49.00    | NA             | 6 (1)                       |
| Barbé F et al 2001          | Parallel   |        | Sham CPAP    | 6                 | 54 (29/25)                       | 52.90    | 90.70           | 29.00    | 4.50            | 55.40    | 7.00           | 9 (4)                       |
| Faccenda JF et al 2001      | Crossover  |        | Placebo      | 4                 | 68 (68/68)                       | 50.00    | 80.90           | 30.00    | 3.30            | 35.00    | 15.00          | 7 (2)                       |
| Monasterio C et al 2001     | Parallel   |        | Conservative | 26                | 125 (66/59)                      | 53.50    | 85.70           | 29.40    | 4.80            | 20.50    | 12.60          | 6 (3)                       |
| Barnes M et al 2002         | Crossover  |        | Placebo      | 8                 | 28 (28/28)                       | 45.50    | 85.70           | 30.20    | 3.53            | 12.90    | 11.30          | 5 (2)                       |
| Pepperell JC et al 2002     | Parallel   |        | Sham CPAP    | 4                 | 118 (59/59)                      | 50.50    | 100.00          | 33.50    | 4.70            | NA       | 16.20          | 10 (4)                      |
| Becker HF et al 2003        | Parallel   |        | Sham CPAP    | 9                 | 32 (16/16)                       | 53.40    | 90.60           | 33.40    | 5.50            | 63.80    | 14.30          | 8 (2)                       |
| Barnes M et al 2004         | Crossover  |        | Placebo      | 13                | 80 (80/80)                       | 46.40    | 78.80           | 31.00    | 3.60            | 21.50    | 10.20          | 6 (2)                       |
| Ip MSM et al 2004           | Parallel   |        | Control      | 4                 | 27 (14/13)                       | 42.70    | 100.00          | 29.40    | 4.20            | 46.40    | 11.10          | 6 (2)                       |
| Mansfield DR et al 2004     | Parallel   |        | Control      | 12                | 40 (21/19)                       | 57.30    | 94.50           | 34.00    | 5.60            | 28.20    | 10.00          | 6 (2)                       |
| Arias MA et al 2005         | Crossover  |        | Sham CPAP    | 13                | 25 (25/25)                       | 52.00    | 100.00          | 30.50    | 6.00            | 44.00    | 12.60          | 8 (3)                       |

| Author and publication year   | Study type | Strata | Comparator   | Follow-up (weeks) | Sample size Total (CPAP/Control) | Age Mean | Male gender (%) | BMI Mean | Compliance Mean | AHI Mean | ESS score Mean | Quality score (Jadad score) |
|-------------------------------|------------|--------|--------------|-------------------|----------------------------------|----------|-----------------|----------|-----------------|----------|----------------|-----------------------------|
| Campos-Rodriguez F et al 2006 | Parallel   |        | Sham CPAP    | 4                 | 68 (34/34)                       | 56.70    | 60.30           | 34.80    | 4.70            | 58.90    | 14.30          | 10 (4)                      |
| Hui DS et al 2006             | Parallel   |        | Sham CPAP    | 12                | 46 (23/23)                       | 50.80    | 80.40           | 27.20    | 3.90            | 31.20    | 10.70          | 9 (4)                       |
| Mills PJ et al 2006           | Parallel   |        | Sham CPAP    | 2                 | 33 (17/16)                       | 48.30    | 84.80           | 31.90    | 6.40            | 63.20    | 12.00          | 7 (3)                       |
| Robinson GV et al 2006        | Parallel   |        | Sham CPAP    | 4                 | 32 (16/16)                       | 54.00    | 88.60           | 33.20    | 4.80            | NA       | 5.30           | 9 (4)                       |
| Coughlin SR et al 2007        | Crossover  |        | Sham CPAP    | 6                 | 34 (34/34)                       | 49.00    | 100.00          | 36.10    | 3.30            | NA       | 13.80          | 8 (4)                       |
| Drager LF et al 2007          | Parallel   |        | No treatment | 17                | 24 (12/12)                       | 45.50    | 100.00          | 29.80    | 6.00            | 59.00    | 13.50          | 8 (3)                       |
| Lam B et al 2007              | Parallel   |        | Control      | 10                | 67 (34/33)                       | 46.00    | 79.10           | 27.50    | 4.20            | 21.40    | 12.00          | 7 (3)                       |
| Noda A et al 2007             | Parallel   |        | No CPAP      | 13                | 33 (14/19)                       | 53.20    | 100.00          | NA       | NA              | 47.00    | NA             | 1 (1)                       |
| Cross MD et al 2008           | Crossover  |        | Sham CPAP    | 6                 | 27 (27/27)                       | 48.00    | 96.30           | 37.00    | 3.80            | 63.00    | 13.65          | 6 (4)                       |
| Egea CJ et al 2008            | Parallel   |        | Sham CPAP    | 13                | 60 (28/30)                       | 63.50    | 93.30           | 31.10    | NA              | 41.90    | 7.60           | 4 (2)                       |
| Ruttanaumpawan P et al 2008   | Parallel   |        | Control      | 4                 | 33 (19/14)                       | 59.60    | 90.90           | 31.20    | 6.20            | 42.60    | NA             | 5 (2)                       |
| Comondore VR et al 2009       | Crossover  |        | No therapy   | 4                 | 13 (13/13)                       | 55.50    | 69.20           | 31.10    | 5.50            | 27.90    | 6.80           | 5 (1)                       |
| Barbé F et al 2010            | Parallel   |        | No CPAP      | 52                | 359 (178/181)                    | 55.50    | 83.30           | 32.50    | 4.70            | 46.00    | 6.40           | 7 (3)                       |

| Author and publication year | Study type | Strata | Comparator             | Follow-up (weeks) | Sample size Total (CPAP/Control) | Age Mean | Male gender (%) | BMI Mean | Compliance Mean | AHI Mean | ESS score Mean | Quality score (Jadad score) |
|-----------------------------|------------|--------|------------------------|-------------------|----------------------------------|----------|-----------------|----------|-----------------|----------|----------------|-----------------------------|
| Durán-Cantolla J et al 2010 | Parallel   |        | Sham CPAP              | 12                | 272 (169/172)                    | 52.40    | 81.50           | 31.90    | 4.30            | 43.50    | 10.00          | 11 (5)                      |
| Lozano L et al 2010         | Parallel   |        | Conventional treatment | 13                | 64 (29/35)                       | 59.20    | 68.80           | 30.80    | 5.60            | 52.70    | 6.14           | 8 (2)                       |
| Nguyen PK et al 2010        | Parallel   |        | Sham CPAP              | 13                | 20 (10/10)                       | 53.40    | 90.00           | 29.80    | 5.00            | 35.20    | 13.65          | 7 (4)                       |
| Drager LF et al 2011        | Parallel   |        | No treatment           | 13                | 36 (18/18)                       | 43.00    | 100.00          | 28.80    | 5.20            | 56.50    | 12.00          | 9 (3)                       |
| Takaesu et al 2011          | Crossover  |        | Sham CPAP              | 4                 | 12 (12/12)                       | 41.30    | 91.70           | 26.20    | 4.85            | 40.70    | .              | 6 (3)                       |
| Craig SE et al 2012         | Parallel   |        | No CPAP                | 24                | 391 (154/156)                    | 57.70    | 78.00           | 32.30    | 2.27            | .        | 7.95           | 5 (2)                       |
| Hoyos CM et al 2012         | Parallel   |        | Sham CPAP              | 12                | 65 (34/31)                       | 49.00    | 100.00          | 31.30    | 3.20            | 39.90    | 10.10          | 7 (5)                       |
| Weaver TE et al 2012        | Parallel   |        | Sham CPAP              | 8                 | 239 (121/118)                    | 50.60    | 58.54           | 33.70    | 5.00            | 12.65    | 14.94          | 8 (4)                       |
| Jones A et al 2013          | Crossover  |        | Sham CPAP              | 12                | 43 (43/43)                       | 46.00    | 65.00           | 29.90    | 3.00            | 31.00    | 13.00          | 8 (5)                       |
| Litvin AY et al 2013        | Crossover  |        | Placebo                | 3                 | 44 (44/44)                       | 55.50    | 77.00           | 37.70    | 5.10            | 63.40    | .              | 6 (2)                       |
| Martinez-Garcia MA 2013     | Parallel   |        | Control                | 12                | 194 (98/96)                      | 58.00    | 68.60           | 34.10    | 5.00            | 40.40    | 9.10           | 9 (3)                       |
| Pedrosa RP et al 2013       | Parallel   |        | Control                | 24                | 35 (19/16)                       | 56.00    | 77.00           | 32.00    | 6.01            | 29.00    | 10.00          | 8 (2)                       |
| Chirinos JA et al 2014      | Parallel   |        | Weight loss            | 24                | 119 (58/61)                      | 49.00    | 57.40           | 38.75    | 4.00            | 42.70    | 9.32           | 4 (2)                       |

| Author and publication year   | Study type | Strata | Comparator             | Follow-up (weeks) | Sample size Total (CPAP/Control) | Age Mean | Male gender (%) | BMI Mean | Compliance Mean | AHI Mean | ESS score Mean | Quality score (Jadad score) |
|-------------------------------|------------|--------|------------------------|-------------------|----------------------------------|----------|-----------------|----------|-----------------|----------|----------------|-----------------------------|
| Dal-Fabbro C et al 2014       | Crossover  |        | Placebo                | 4                 | 29 (29/29)                       | 47.00    | NA              | 28.40    | 5.90            | 42.30    | 11.30          | 7 (2)                       |
| De Oliveira AC et al 2014     | Parallel   |        | Sham CPAP              | 8                 | 47 (24/23)                       | 59.40    | 57.00           | 29.80    | NA              | 20.00    | 10.00          | 7 (3)                       |
| Gottlieb DJ et al 2014        | Parallel   |        | HLSE                   | 12                | 187 (90/97)                      | 63.20    | 72.40           | 33.84    | 3.50            | 24.70    | 8.80           | 7 (3)                       |
| Hall AB et al 2014            | Parallel   |        | No CPAP                | 7                 | 45 (22/23)                       | 61.40    | 75.50           | NA       | 4.22            | 27.20    | 10.13          | 6 (3)                       |
| Liu X et al 2014              | Parallel   |        | No CPAP                | 12                | 80 (40/40)                       | 63.00    | 72.50           | 25.25    | NA              | 30.60    | NA             | 5 (2)                       |
| Lloberes P et al 2014         | Parallel   | TRH    | Conservative treatment | 12                | 56 (27/29)                       | 58.70    | 72.40           | 32.00    | 5.70            | 50.00    | 7.30           | 8 (3)                       |
|                               |            | WCRH   | Conservative treatment | 12                | 22 (9/13)                        | 58.80    | 70.80           | 29.70    | 5.30            | 52.80    | 5.50           |                             |
| McMillan A et al 2014         | Parallel   |        | Conservative treatment | 48                | 278 (113/116)                    | 71.10    | 82.50           | 33.75    | 2.22            | 28.70    | 11.60          | 5 (3)                       |
| Hoyos CM et al 2015           | Parallel   |        | Sham CPAP              | 8                 | 30 (14/17)                       | 49.10    | 86.00           | 31.40    | 4.30            | 40.00    | 10.50          | 10 (5)                      |
| Huang Z et al 2015            | Parallel   |        | Control                | 148               | 73 (36/37)                       | 62.30    | 82.20           | 27.70    | 4.50            | 28.50    | 8.80           | 7 (3)                       |
| Martinez-Garcia MA et al 2015 | Parallel   |        | Control                | 12                | 224 (115/109)                    | 75.50    | 68.30           | 32.90    | 4.90            | 50.40    | 9.50           | 5 (2)                       |
| Muxfeldt ES et al 2015        | Parallel   |        | Control                | 24                | 117 (46/60)                      | 60.50    | 39.80           | 33.40    | 4.80            | 41.00    | 11.00          | 9 (3)                       |
| Pamidi S et al 2015           | Parallel   |        | Placebo                | 2                 | 38 (26/12)                       | 54.30    | 67.00           | 35.40    | 8.00            | 35.80    | 10.30          | 8 (3)                       |

| Author and publication year   | Study type | Strata | Comparator                | Follow-up (weeks) | Sample size Total (CPAP/Control) | Age Mean | Male gender (%) | BMI Mean | Compliance Mean | AHI Mean | ESS score Mean | Quality score (Jadad score) |
|-------------------------------|------------|--------|---------------------------|-------------------|----------------------------------|----------|-----------------|----------|-----------------|----------|----------------|-----------------------------|
| Thunström E et al 2015        | Parallel   |        | No treatment              | 24                | 47 (24/23)                       | 58.70    | 68.10           | 27.70    | 5.00            | 23.30    | 9.68           | 8 (2)                       |
| McEvoy et al 2016             | Parallel   |        | No CPAP                   | NA                | 2717 (1166/1158)                 | 61.30    | 80.90           | 28.70    | 5.20            | 29.30    | 7.40           | 6 (3)                       |
| Paz y Mar H et al 2016        | Parallel   |        | Sham CPAP                 | 8                 | 149 (72/71)                      | 51.00    | 53.70           | 37.30    | 3.50            | 19.30    | 10.00          | 8 (5)                       |
| Salord N et al 2016           | Parallel   |        | Conservative treatment    | 12                | 80 (42/38)                       | 46.60    | 27.50           | 47.50    | 5.40            | 60.50    | 7.80           | 7 (3)                       |
| Shaw JE et al 2016            | Parallel   |        | Conservative treatment    | 24                | 298 (119/137)                    | 62.30    | 64.50           | 49.30    | 4.90            | 27.10    | 9.50           | 6 (3)                       |
| Campos-Rodriguez F et al 2017 | Parallel   |        | Conservative treatment    | 12                | 307 (151/156)                    | 57.10    | 0.00            | 33.70    | 4.00            | 32.00    | 9.80           | 6 (3)                       |
| Casitas R et al 2017          | Crossover  | INH    | Sham CPAP                 | 12                | 16 (15/16)                       | 58.00    | 81.00           | 30.00    | 5.30            | 44.00    | 8.20           | 10 (5)                      |
|                               |            | DNSH   |                           |                   | 16 (15/16)                       | 54.00    | 81.00           | 28.30    | NA              | 37.90    | 91.00          |                             |
| Lam JCM et al 2017            | Parallel   |        | No treatment              | 12                | 64 (32/32)                       | 55.00    | 26.00           | 29.90    | 2.50            | 45.30    | 7.50           | 5 (3)                       |
| Gupta A et al 2018            | Parallel   |        | Control                   | 52                | 70 (30/40)                       | 53.03    | 81.43           | 25.26    | 4.20            | 32.20    | 6.00           | 6 (3)                       |
| Joyeux-Faure M et al 2018     | Parallel   |        | Sham CPAP                 | 12                | 37 (19/18)                       | 60.00    | 86.50           | 28.60    | 2.88            | 37.60    | 8.20           | 6 (3)                       |
| Shim CY et al 2018            | Parallel   |        | Pharmacological treatment | 12                | 52 (26/26)                       | 49.30    | 93.00           | 27.00    | 4.90            | 57.70    | NA             | 9 (5)                       |
| Zou B et al 2018              | Parallel   |        | Control                   | 12                | 90 (43/47)                       | 59.90    | 63.33           | 31.80    | 4.70            | 43.18    | 9.90           | 6 (2)                       |

**Table E2.** Chronological summary of literature on the effect of OSA treatment on systolic blood pressure (references [16–76] in main article References list).

| Author and publication year   | Study type | Strata | Type measure        | CPAP arm      |                    | Control arm   |                    | $\Delta$<br>Mean (SE) |
|-------------------------------|------------|--------|---------------------|---------------|--------------------|---------------|--------------------|-----------------------|
|                               |            |        |                     | Baseline Mean | End-treatment Mean | Baseline Mean | End-treatment Mean |                       |
| Engleman HM et al 1996        | Crossover  |        | Daytime             | NA            | 138.00             | NA            | 139.00             | -1.00 (4.49)          |
| Barbé F et al 2001            | Parallel   |        | 24-h                | 126.00        | 124.00             | 123.00        | 122.00             | -1.00 (2.82)          |
| Faccenda JF et al 2001        | Crossover  |        | 24-h                | NA            | 126.90             | NA            | 128.20             | -1.30 (1.02)          |
| Monasterio C et al 2001       | Parallel   |        | Office              | 126.00        | 122.00             | 132.00        | 130.00             | -2.00 (2.94)          |
| Barnes M et al 2002           | Crossover  |        | 24-h                | 130.50        | 129.80             | 130.50        | 129.30             | 0.50 (1.95)           |
| Pepperell JC et al 2002       | Parallel   |        | 24-h                | 132.50        | 130.20             | 134.90        | 135.90             | -3.40 (1.45)          |
| Becker HF et al 2003          | Parallel   |        | Mean 20-h Portapres | 135.90        | 126.40             | 136.20        | 137.30             | -10.60 (5.23)         |
| Barnes M et al 2004           | Crossover  |        | 24-h                | 126.00        | 127.30             | 126.00        | 128.20             | -1.40 (1.26)          |
| Ip MSM et al 2004             | Parallel   |        | Office              | 122.10        | 120.20             | 123.00        | 120.80             | 0.30 (4.27)           |
| Mansfield DR et al 2004       | Parallel   |        | Office              | 135.00        | 136.00             | 143.00        | 135.00             | 9.00 (5.98)           |
| Arias MA et al 2005           | Crossover  |        | Daytime             | 127.00        | 127.00             | 127.00        | 127.00             | 0.00 (2.32)           |
| Campos-Rodriguez F et al 2006 | Parallel   |        | 24-h                | 132.90        | 131.30             | 130.40        | 129.80             | -0.90 (2.50)          |

| Author and publication year | Study type | Strata | Type measure | CPAP arm      |                    | Control arm   |                    | $\Delta$<br>Mean (SE) |
|-----------------------------|------------|--------|--------------|---------------|--------------------|---------------|--------------------|-----------------------|
|                             |            |        |              | Baseline Mean | End-treatment Mean | Baseline Mean | End-treatment Mean |                       |
| Hui DS et al 2006           | Parallel   |        | 24-h         | 125.90        | 123.50             | 122.00        | 120.20             | -0.40 (5.23)          |
| Mills PJ et al 2006         | Parallel   |        | Office       | 155.20        | 145.10             | 149.00        | 146.90             | -8.00 (6.60)          |
| Robinson GV et al 2006      | Parallel   |        | 24-h         | 140.30        | 137.00             | 143.00        | 139.30             | -0.10 (2.65)          |
| Coughlin SR et al 2007      | Crossover  |        | Office       | NA            | 135.70             | NA            | 142.40             | -6.70 (1.73)          |
| Drager LF et al 2007        | Parallel   |        | Daytime      | 122.00        | 119.00             | 124.00        | 122.00             | -1.00 (3.36)          |
| Lam B et al 2007            | Parallel   |        | Office       | 127.90        | 123.00             | 125.50        | 126.70             | -6.10 (3.88)          |
| Noda A et al 2007           | Parallel   |        | Office       | 145.00        | 128.00             | 144.00        | 141.00             | -14.00 (3.68)         |
| Cross MD et al 2008         | Crossover  |        | Office       | 143.20        | 141.00             | 143.20        | 144.80             | -3.80 (3.81)          |
| Egea CJ et al 2008          | Parallel   |        | Office       | 123.00        | 123.00             | 124.20        | 120.50             | 3.70 (4.26)           |
| Ruttanaumpawan P et al 2008 | Parallel   |        | Day Finepres | 122.00        | 113.00             | 131.00        | 136.00             | -14.00 (6.90)         |
| Comondore VR et al 2009     | Crossover  |        | 24-h         | 139.30        | 131.90             | 137.40        | 133.60             | -3.60 (7.58)          |
| Barbé F et al 2010          | Parallel   |        | Office       | 141.00        | 134.66             | 141.00        | 136.80             | -2.21 (1.44)          |
| Durán-Cantolla J et al 2010 | Parallel   |        | 24-h         | 131.00        | 128.00             | 129.00        | 128.00             | -2.10 (0.84)          |

| Author and publication year | Study type | Strata | Type measure | CPAP arm      |                    | Control arm   |                    | $\Delta$<br>Mean (SE) |
|-----------------------------|------------|--------|--------------|---------------|--------------------|---------------|--------------------|-----------------------|
|                             |            |        |              | Baseline Mean | End-treatment Mean | Baseline Mean | End-treatment Mean |                       |
| Lozano L et al 2010         | Parallel   |        | 24-h         | 130.50        | 129.20             | 129.40        | 131.10             | -3.00 (3.54)          |
| Nguyen PK et al 2010        | Parallel   |        | Office       | 121.00        | 126.00             | 127.00        | 130.40             | 1.60 (5.45)           |
| Drager LF et al 2011        | Parallel   |        | 24-h         | 122.00        | 117.00             | 121.00        | 125.00             | -9.00 (2.53)          |
| Takaesu et al 2011          | Crossover  |        | Office       | 141.70        | 135.00             | 141.70        | 143.10             | -8.10 (5.59)          |
| Craig SE et al 2012         | Parallel   |        | Office       | 129.70        | 131.10             | 130.10        | 129.80             | 1.80 (0.89)           |
| Hoyos CM et al 2012         | Parallel   |        | Office       | NA            | NA                 | NA            | NA                 | -4.25 (2.73)          |
| Weaver TE et al 2012        | Parallel   |        | 48-h Daytime | 124.50        | 125.22             | 124.40        | 126.44             | -1.32 (1.61)          |
| Jones A et al 2013          | Crossover  |        | Office       | 128.00        | 126.00             | 128.00        | 129.00             | -3.00 (2.25)          |
| Litvin AY et al 2013        | Crossover  |        | Office       | 141.00        | 135.00             | 141.00        | 140.00             | -5.00 (1.77)          |
| Martinez-Garcia MA 2013     | Parallel   |        | 24-h         | 144.90        | 140.20             | 143.50        | 142.30             | -4.20 (1.94)          |
| Pedrosa RP et al 2013       | Parallel   |        | 24-h         | NA            | NA                 | NA            | NA                 | -7.80 (4.24)          |
| Chirinos JA et al 2014      | Parallel   |        | Office       | 129.90        | 125.70             | 126.50        | 121.40             | 0.90 (2.60)           |
| Dal-Fabbro C et al 2014     | Crossover  |        | 24-h         | 128.60        | 129.10             | 128.60        | 130.30             | -1.20 (2.82)          |

| Author and publication year   | Study type | Strata                            | Type measure | CPAP arm      |                    | Control arm   |                    | $\Delta$<br>Mean (SE) |
|-------------------------------|------------|-----------------------------------|--------------|---------------|--------------------|---------------|--------------------|-----------------------|
|                               |            |                                   |              | Baseline Mean | End-treatment Mean | Baseline Mean | End-treatment Mean |                       |
| De Oliveira AC et al 2014     | Parallel   |                                   | 24-h         | 150.00        | NA                 | 146.00        | .                  | -9.30 (4.46)          |
| Gottlieb DJ et al 2014        | Parallel   |                                   | 24-h         | 124.70        | 123.40             | 123.60        | 124.70             | -2.40 (1.87)          |
| Hall AB et al 2014            | Parallel   |                                   | Office       | 115.90        | 116.50             | 119.90        | 113.90             | 6.60 (5.32)           |
| Liu X et al 2014              | Parallel   |                                   | Daytime      | 128.50        | NA                 | 127.80        | 127.50             | -0.70 (0.10)          |
| Lloberes P et al 2014         | Parallel   | True resistant hypertension       | 24-h         | 140.10        | 137.80             | 139.60        | 141.90             | -4.65 (3.03)          |
|                               |            | White coat resistant hypertension | 24-h         | 133.10        | 135.60             | 132.30        | 136.50             | -1.60 (5.82)          |
| McMillan A et al 2014         | Parallel   |                                   | Office       | 138.00        | 137.50             | 141.70        | 135.50             | 5.70 (2.14)           |
| Hoyos CM et al 2015           | Parallel   |                                   | Office       | NA            | NA                 | NA            | NA                 | -4.10 (1.38)          |
| Huang Z et al 2015            | Parallel   |                                   | Office       | 148.00        | 139.00             | 146.00        | 143.00             | -5.00 (2.08)          |
| Martinez-Garcia MA et al 2015 | Parallel   |                                   | Office       | NA            | NA                 | NA            | NA                 | -0.90 (1.10)          |
| Muxfeldt ES et al 2015        | Parallel   |                                   | 24-h         | 126.70        | 127.50             | 130.50        | 130.10             | -0.50 (2.35)          |
| Pamidi S et al 2015           | Parallel   |                                   | 24-h         | 135.20        | 133.30             | 130.80        | 138.40             | -9.50 (3.62)          |
| Thunström E et al 2015        | Parallel   |                                   | 24-h         | 136.50        | 131.70             | 135.50        | 135.00             | -4.40 (8.38)          |

| Author and publication year   | Study type | Strata                           | Type measure | CPAP arm      |                    | Control arm   |                    | $\Delta$<br>Mean (SE) |
|-------------------------------|------------|----------------------------------|--------------|---------------|--------------------|---------------|--------------------|-----------------------|
|                               |            |                                  |              | Baseline Mean | End-treatment Mean | Baseline Mean | End-treatment Mean |                       |
| McEvoy et al 2016             | Parallel   |                                  | Office       | 132.00        | 132.00             | 131.00        | 132.00             | -0.40 (0.59)          |
| Paz y Mar H et al 2016        | Parallel   |                                  | Office       | 126.90        | 123.46             | 125.70        | 125.87             | -3.61 (1.88)          |
| Salord N et al 2016           | Parallel   |                                  | Office       | 136.00        | 135.00             | 145.00        | 140.00             | -4.27 (3.55)          |
| Shaw JE et al 2016            | Parallel   |                                  | Office       | 132.40        | 129.10             | 130.60        | 129.70             | -1.80 (1.66)          |
| Campos-Rodriguez F et al 2017 | Parallel   |                                  | Office       | 131.83        | 126.11             | 129.85        | 126.12             | -1.54 (1.55)          |
| Casitas R et al 2017          | Crossover  | Isolated nocturnal hypertension  | Daytime      | 129.00        | 128.70             | 129.00        | 127.90             | 0.80 (1.78)           |
|                               |            | Day-night sustained hypertension | Daytime      | 14.00         | 10.40              | 141.00        | 141.80             | -4.40 (2.49)          |
| Lam JCM et al 2017            | Parallel   |                                  | Office       | 145.00        | 133.00             | 140.00        | 136.00             | -8.00 (4.34)          |
| Gupta A et al 2018            | Parallel   |                                  | Office       | 126.54        | 128.13             | 125.78        | 125.63             | 1.74 (1.98)           |
| Joyeux-Faure M et al 2018     | Parallel   |                                  | 24-h         | NA            | NA                 | NA            | NA                 | -1.88 (3.08)          |
| Shim CY et al 2018            | Parallel   |                                  | 24-h         | 130.10        | 125.40             | 126.90        | 123.40             | -1.20 (4.81)          |
| Zou B et al 2018              | Parallel   |                                  | 24-h         | 148.90        | 146.60             | 145.20        | 148.00             | -5.10 (1.95)          |

NA= Not available;  $\Delta$  = difference between SBP end treatment and baseline in CPAP group and between SBP end treatment and baseline in control group

**Table E3.** Chronological summary of literature on the effect of OSA treatment on diastolic blood pressure (references [16–76] in main article References list).

| Author and publication year   | Study type | Strata | Type measure        | CPAP arm      |                    | Control arm   |                    | $\Delta$<br>Mean (SE) |
|-------------------------------|------------|--------|---------------------|---------------|--------------------|---------------|--------------------|-----------------------|
|                               |            |        |                     | Baseline Mean | End-treatment Mean | Baseline Mean | End-treatment Mean |                       |
| Engleman HM et al 1996        | Crossover  |        | Daytime             | NA            | 84.00              | NA            | 86.00              | -2.00 (3.79)          |
| Barbé F et al 2001            | Parallel   |        | 24-h                | 79.00         | 79.00              | 77.00         | 77.00              | -1.00 (1.41)          |
| Faccenda JF et al 2001        | Crossover  |        | 24-h                | NA            | 77.80              | NA            | 79.20              | -1.50 (0.74)          |
| Monasterio C et al 2001       | Parallel   |        | Office              | 81.00         | 80.00              | 84.00         | 84.00              | -1.00 (1.78)          |
| Barnes M et al 2002           | Crossover  |        | 24-h                | 81.60         | 79.50              | 81.60         | 80.40              | -0.90 (4.82)          |
| Pepperell JC et al 2002       | Parallel   |        | 24-h                | 85.10         | 82.70              | 85.10         | 85.90              | -3.30 (1.05)          |
| Becker HF et al 2003          | Parallel   |        | Mean 20-h Portapres | 83.40         | 73.10              | 81.10         | 82.10              | -11.30 (3.90)         |
| Barnes M et al 2004           | Crossover  |        | 24-h                | 76.30         | 76.70              | 76.30         | 77.30              | -0.60 (0.88)          |
| Ip MSM et al 2004             | Parallel   |        | Office              | 77.90         | 69.20              | 73.10         | 73.30              | -8.90 (4.67)          |
| Mansfield DR et al 2004       | Parallel   |        | Office              | 82.00         | 83.00              | 87.00         | 82.00              | 6.00 (2.95)           |
| Arias MA et al 2005           | Crossover  |        | Daytime             | 79.00         | 78.00              | 79.00         | 78.00              | 0.00 (1.20)           |
| Campos-Rodriguez F et al 2006 | Parallel   |        | 24-h                | 78.40         | 76.90              | 77.60         | 76.80              | -0.70 (1.45)          |

| Author and publication year | Study type | Strata | Type measure | CPAP arm      |                    | Control arm   |                    | $\Delta$<br>Mean (SE) |
|-----------------------------|------------|--------|--------------|---------------|--------------------|---------------|--------------------|-----------------------|
|                             |            |        |              | Baseline Mean | End-treatment Mean | Baseline Mean | End-treatment Mean |                       |
| Hui DS et al 2006           | Parallel   |        | 24-h         | 82.50         | 80.10              | 79.60         | 80.70              | -3.50 (1.56)          |
| Mills PJ et al 2006         | Parallel   |        | Office       | 84.20         | 79.50              | 83.60         | 82.90              | -4.00 (3.92)          |
| Robinson GV et al 2006      | Parallel   |        | 24-h         | 85.30         | 84.20              | 86.70         | 86.80              | -1.47 (2.68)          |
| Coughlin SR et al 2007      | Crossover  |        | Office       | NA            | 86.80              | NA            | 91.70              | -4.90 (1.58)          |
| Drager LF et al 2007        | Parallel   |        | Daytime      | 79.00         | 75.00              | 78.00         | 75.00              | -1.00 (2.64)          |
| Lam B et al 2007            | Parallel   |        | Office       | 77.00         | 71.80              | 74.20         | 71.00              | -2.00 (2.69)          |
| Noda A et al 2007           | Parallel   |        | Office       | 90.00         | 83.00              | 89.00         | 88.00              | -6.00 (3.43)          |
| Cross MD et al 2008         | Crossover  |        | Office       | 80.40         | 82.30              | 80.40         | 82.30              | 0.00 (2.18)           |
| Egea CJ et al 2008          | Parallel   |        | Office       | 76.30         | 75.30              | 74.80         | 75.20              | -1.40 (3.23)          |
| Ruttanaumpawan P et al 2008 | Parallel   |        | Day Finepres | 67.00         | 61.00              | 64.00         | 63.00              | -5.00 (3.86)          |
| Comondore VR et al 2009     | Crossover  |        | 24-h         | 82.70         | 79.00              | 84.80         | 81.80              | -0.70 (3.99)          |
| Barbé F et al 2010          | Parallel   |        | Office       | 85.00         | 80.88              | 86.00         | 83.78              | -2.89 (0.93)          |
| Durán-Cantolla J et al 2010 | Parallel   |        | 24-h         | 83.00         | 81.00              | 82.00         | 82.00              | -1.30 (0.54)          |

| Author and publication year | Study type | Strata | Type measure | CPAP arm      |                    | Control arm   |                    | $\Delta$<br>Mean (SE) |
|-----------------------------|------------|--------|--------------|---------------|--------------------|---------------|--------------------|-----------------------|
|                             |            |        |              | Baseline Mean | End-treatment Mean | Baseline Mean | End-treatment Mean |                       |
| Lozano L et al 2010         | Parallel   |        | 24-h         | 76.70         | 74.70              | 75.40         | 76.30              | -2.90 (1.79)          |
| Nguyen PK et al 2010        | Parallel   |        | Office       | 75.20         | 83.90              | 78.90         | 78.70              | 8.90 (4.43)           |
| Drager LF et al 2011        | Parallel   |        | 24-h         | 79.00         | 74.00              | 78.00         | 80.00              | -7.00 (2.07)          |
| Takaesu et al 2011          | Crossover  |        | Office       | 84.90         | 79.60              | 84.90         | 85.50              | -5.90 (4.05)          |
| Craig SE et al 2012         | Parallel   |        | Office       | 81.20         | 80.80              | 81.40         | 81.30              | -0.40 (0.46)          |
| Hoyos CM et al 2012         | Parallel   |        | Office       | NA            | NA                 | NA            | NA                 | 0.45 (1.95)           |
| Weaver TE et al 2012        | Parallel   |        | 48-h Daytime | 76.20         | 75.63              | 74.80         | 76.16              | -1.93 (0.97)          |
| Jones A et al 2013          | Crossover  |        | Office       | 76.00         | 77.00              | 76.00         | 77.00              | 0.00 (1.48)           |
| Litvin AY et al 2013        | Crossover  |        | Office       | 85.00         | 80.00              | 85.00         | 86.00              | -6.00 (1.41)          |
| Martinez-Garcia MA 2013     | Parallel   |        | 24-h         | 83.40         | 79.50              | 82.60         | 82.10              | -3.80 (1.20)          |
| Pedrosa RP et al 2013       | Parallel   |        | 24-h         | NA            | NA                 | NA            | NA                 | -5.50 (2.83)          |
| Dal-Fabbro C et al 2014     | Crossover  |        | 24-h         | 80.60         | 79.50              | 80.60         | 80.30              | -0.80 (2.09)          |
| De Oliveira AC et al 2014   | Parallel   |        | 24-h         | 88.00         | NA                 | 88.00         | NA                 | -4.40 (2.50)          |

| Author and publication year   | Study type | Strata                            | Type measure | CPAP arm      |                    | Control arm   |                    | $\Delta$<br>Mean (SE) |
|-------------------------------|------------|-----------------------------------|--------------|---------------|--------------------|---------------|--------------------|-----------------------|
|                               |            |                                   |              | Baseline Mean | End-treatment Mean | Baseline Mean | End-treatment Mean |                       |
| Gottlieb DJ et al 2014        | Parallel   |                                   | 24-h         | 72.00         | 69.80              | 69.90         | 70.90              | -3.20 (1.12)          |
| Liu X et al 2014              | Parallel   |                                   | Daytime      | 83.50         | 81.00              | 82.90         | 82.30              | -1.90 (0.24)          |
| Lloberes P et al 2014         | Parallel   | True resistant hypertension       | 24-h         | 80.80         | 76.40              | 81.40         | 81.60              | -4.65 (1.70)          |
|                               |            | White coat resistant hypertension | 24-h         | 77.60         | 75.60              | 77.20         | 78.10              | -2.90 (3.06)          |
| McMillan A et al 2014         | Parallel   |                                   | Office       | 77.80         | 76.20              | 78.50         | 76.20              | 0.70 (1.35)           |
| Hoyos CM et al 2015           | Parallel   |                                   | Office       | NA            | NA                 | NA            | NA                 | -3.80 (1.15)          |
| Huang Z et al 2015            | Parallel   |                                   | Office       | 83.00         | 79.00              | 83.00         | 81.00              | -1.00 (2.58)          |
| Martinez-Garcia MA et al 2015 | Parallel   |                                   | Office       | NA            | NA                 | NA            | NA                 | 0.30 (0.52)           |
| Muxfeldt ES et al 2015        | Parallel   |                                   | 24-h         | 74.70         | 74.50              | 75.70         | 75.20              | -0.20 (1.51)          |
| Pamidi S et al 2015           | Parallel   |                                   | 24-h         | 79.30         | 76.70              | 75.60         | 80.10              | -7.10 (1.96)          |
| Thunström E et al 2015        | Parallel   |                                   | 24-h         | 83.60         | 81.00              | 84.80         | 84.00              | -1.90 (3.24)          |
| McEvoy et al 2016             | Parallel   |                                   | Office       | 80.00         | 79.00              | 79.00         | 79.00              | -0.70 (0.36)          |
| Paz y Mar H et al 2016        | Parallel   |                                   | Office       | 79.60         | 78.23              | 76.30         | 76.41              | -1.48 (1.32)          |

| Author and publication year   | Study type | Strata                           | Type measure | CPAP arm      |                    | Control arm   |                    | $\Delta$<br>Mean (SE) |
|-------------------------------|------------|----------------------------------|--------------|---------------|--------------------|---------------|--------------------|-----------------------|
|                               |            |                                  |              | Baseline Mean | End-treatment Mean | Baseline Mean | End-treatment Mean |                       |
| Salord N et al 2016           | Parallel   |                                  | Office       | 85.00         | 87.00              | 90.00         | 90.00              | -2.01 (2.84)          |
| Shaw JE et al 2016            | Parallel   |                                  | Office       | 76.70         | 73.60              | 77.30         | 75.70              | -1.90 (1.10)          |
| Campos-Rodriguez F et al 2017 | Parallel   |                                  | Office       | 79.95         | 75.44              | 80.42         | 77.88              | -2.04 (1.01)          |
| Casitas R et al 2017          | Crossover  | Isolated nocturnal hypertension  | Daytime      | 76.00         | 76.10              | 76.00         | 77.00              | -0.90 (1.68)          |
|                               |            | Day-night sustained hypertension | Daytime      | 88.00         | 84.90              | 88.00         | 87.90              | -3.00 (1.68)          |
| Lam JCM et al 2017            | Parallel   |                                  | Office       | 88.00         | 77.00              | 82.00         | 80.00              | -6.00 (2.55)          |
| Gupta A et al 2018            | Parallel   |                                  | Office       | 87.63         | 86.23              | 85.43         | 84.12              | -0.09 (1.52)          |
| Joyeux-Faure M et al 2018     | Parallel   |                                  | 24-h         | NA            | NA                 | NA            | NA                 | -1.69 (2.28)          |
| Shim CY et al 2018            | Parallel   |                                  | 24-h         | 83.70         | 78.80              | 82.90         | 78.60              | -0.60 (3.19)          |
| Zou B et al 2018              | Parallel   |                                  | 24-h         | 84.90         | 82.80              | 86.30         | 87.40              | -3.20 (1.48)          |

NA= Not available;  $\Delta$  = difference between SBP end treatment and baseline in CPAP group and between SBP end treatment and baseline in control group

**Table E4.** Stratified analysis for RCT quality.

| <b>SBP</b>        | <b>N</b> | <b>MD</b> | <b>SE</b> | <b>Inf</b> | <b>Sup</b> | <b>I<sup>2</sup></b> | <b>P-value</b> |
|-------------------|----------|-----------|-----------|------------|------------|----------------------|----------------|
| Low (0-5)         | 11       | -0.489    | 0.99      | -2.429     | 1.452      | 74%                  | 0.16           |
| Medium (6-8)      | 39       | -2.483    | 0.444     | -3.353     | -1.613     | 28%                  |                |
| High ( $\geq 9$ ) | 13       | -2.576    | 0.637     | -3.824     | -1.328     | 24%                  |                |
| <b>DBP</b>        | <b>N</b> | <b>MD</b> | <b>SE</b> | <b>Inf</b> | <b>Sup</b> | <b>I<sup>2</sup></b> | <b>P-value</b> |
| Low (0-5)         | 10       | -1.069    | 0.603     | -2.25      | 0.112      | 68%                  | 0.24           |
| Medium (6-8)      | 38       | -2.049    | 0.358     | -2.75      | -1.348     | 48%                  |                |
| High ( $\geq 9$ ) | 13       | -2.334    | 0.472     | -3.26      | -1.409     | 35%                  |                |

## Supplementary bibliography

(including references for Figures E1 and E2)

- Andren, A., P. Hedberg, M. L. Walker-Engstrom, P. Wahlen and A. Tegelberg (2013). "Effects of treatment with oral appliance on 24-h blood pressure in patients with obstructive sleep apnea and hypertension: a randomized clinical trial." Sleep Breath **17**(2): 705-712.
- Barnes, M., R. D. McEvoy, S. Banks, N. Tarquinio, C. G. Murray, N. Vowles and R. J. Pierce (2004). "Efficacy of positive airway pressure and oral appliance in mild to moderate obstructive sleep apnea." Am J Respir Crit Care Med **170**(6): 656-664.
- Dal-Fabbro, C., S. Garbuio, V. D'Almeida, F. D. Cintra, S. Tufik and L. Bittencourt (2014). "Mandibular advancement device and CPAP upon cardiovascular parameters in OSA." Sleep Breath **18**(4): 749-759.
- Duran-Cantolla, J., R. Crovetto-Martinez, M. H. Alkhraisat, M. Crovetto, A. Municio, R. Kutz, F. Aizpuru, E. Miranda and E. Anitua (2015). "Efficacy of mandibular advancement device in the treatment of obstructive sleep apnea syndrome: A randomized controlled crossover clinical trial." Medicina Oral Patologia Oral Y Cirugia Bucal **20**(5): E605-E615.
- Gagnadoux, F., J. L. Pepin, B. Vielle, V. Bironneau, F. Chouet-Girard, S. Launois, N. Meslier, J. C. Meurice, N. G. X.-L, A. Paris, P. Priou, R. Tamisier, W. Trzepizur, F. Goupil and B. Fleury (2017). "Impact of mandibular advancement therapy on endothelial function in severe obstructive sleep apnea." American Journal of Respiratory and Critical Care Medicine. Conference: American Thoracic Society International Conference, ATS **195**(no pagination).
- Glos, M., T. Penzel, C. Schoebel, G. R. Nitzsche, S. Zimmermann, C. Rudolph, A. Blau, G. Baumann, P. G. Jost-Brinkmann, S. Rautengarten, J. C. Meier, I. Peroz and I. Fietze (2016). "Comparison of effects of OSA treatment by MAD and by CPAP on cardiac autonomic function during daytime." Sleep Breath **20**(2): 635-646.
- Gotsopoulos, H., J. J. Kelly and P. A. Cistulli (2004). "Oral appliance therapy reduces blood pressure in obstructive sleep apnea: a randomized, controlled trial." Sleep **27**(5): 934-941.
- Lam, B., K. Sam, W. Y. W. Mok, M. T. Cheung, D. Y. T. Fong, J. C. M. Lam, D. C. L. Lam, L. Y. C. Yam and M. S. M. Ip (2007). "Randomised study of three non-surgical treatments in mild to moderate obstructive sleep apnoea." Thorax **62**(4): 354-359.
- Philippe, C., M. Stoica-Herman, X. Drouot, B. Raffestin, P. Escourrou, L. Hittinger, P. L. Michel, S. Rouault and M. P. D'Ortho (2006). "Compliance with and effectiveness of adaptive servoventilation versus continuous positive airway pressure in the treatment of Cheyne-Stokes respiration in heart failure over a six month period." Heart **92**(3): 337-342.
- Sharples, L., M. Glover, A. Clutterbuck-James, M. Bennett, J. Jordan, R. Chadwick, M. Pittman, C. East, M. Cameron, M. Davies, N. Oscroft, I. Smith, M. Morrell, J. Fox-Rushby and T. Quinnell (2014). "Clinical effectiveness and cost-effectiveness results from the randomised controlled Trial of Oral Mandibular Advancement Devices for Obstructive sleep apnoea-hypopnoea (TOMADO) and long-term economic analysis of oral devices and continuous positive airway pressure." Health Technol Assess **18**(67): 1-296.
